# Supplementary material
Source: HighWire-hosted journal article supplement (http://www.cmaj.ca/highwire/filestream/58849/field_highwire_adjunct_files/1/job-kivi-2-at.pdf)
Supplement: job-kivi-2-at.pdf [file job-kivi-2-at.pdf]

## Appendix 2: Calculation of population attributable risk

We calculated population attributable risk (PAR) for 3 exposures (job strain, unhealthy lifestyle and their combination) using the formula  $f(HR-1)/[1+f(HR-1)]$ , in which  $f$  is the frequency of exposure in the total population at baseline and HR is the age-, sex- and cohort-adjusted hazard ratio for coronary artery disease in the exposed group relative to the unexposed group. For an unhealthy lifestyle, PAR was computed for “1 lifestyle risk factor” and “ $\geq 2$  lifestyle risk factors” categories in combination versus no lifestyle risk factors. For the job strain–lifestyle variable, PAR was computed for combined categories of job strain–healthy lifestyle, job strain–moderately unhealthy lifestyle, job strain–unhealthy lifestyle, no job strain–moderately unhealthy lifestyle and no job strain–unhealthy lifestyle versus no job strain–healthy lifestyle.
